# Supplementary material
Source: Research Square preprint supplement (doi:10.21203/rs.3.rs-9760368/v1)
Supplement: Supplementary file 1 [file 6c3317e75ba1b63a0fc68230.docx]

Synthesis and performance evaluation of a carboxyl-, sulfonic-, and amino-functionalized polyaspartic acid polymer for calcium sulfate scale inhibition

Ruijing Feng a#, Kang Wang b#, Jiahui Liu a, Jiaqing Yu b, Wenwen Zhao a, Eryang Ming b, Anchang Xu a, Xiaoqi Wang b*, Yehan Wang a and Fan Yang a*

a State Key Laboratory of Heavy oil Processing, College of Chemical Engineering, China University of Petroleum, Beijing Changping 102249, China; b Research Institute of Petroleum Exploration & Development, PetroChina Company Limited, Beijing 100083, China.

# These authors contributed equally.

* Corresponding Authors: Prof. Fan Yang, E-mail: [yangfan@cup.edu.cn](mailto:yangfan@cup.edu.cn" \t "_blank), Tel: +86 136 1127 0644. Xiaoqi Wang, E-mail: wangxq07@petrochina.com.cn, Tel: +86 188 0013 5961.

| 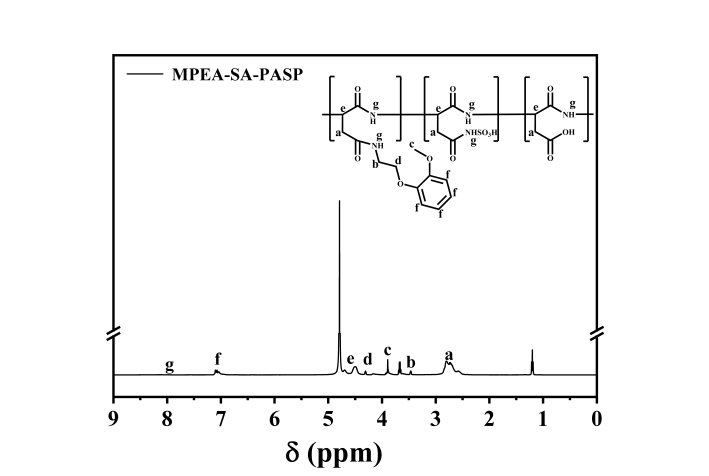  a | 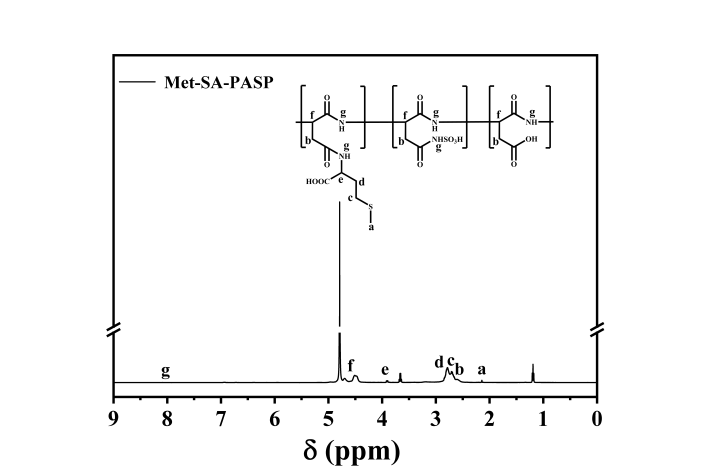  b |
| --- | --- |
| 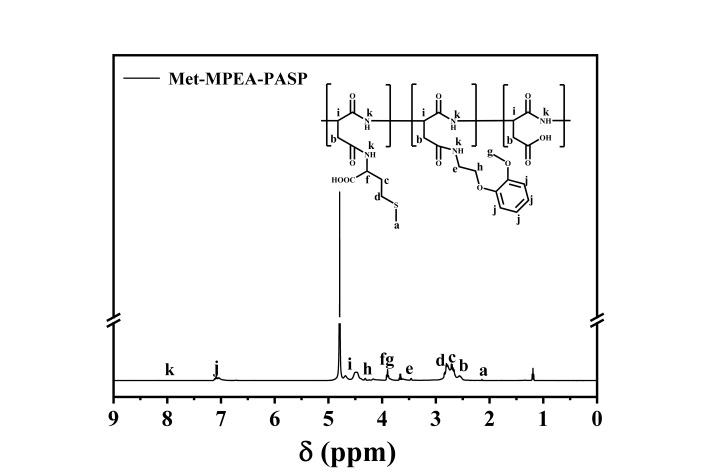  c |  |

**Fig. S1** 1H NMR spectra of ternary polymers (where (a) represents the MPEA-SA-PASP polymer; (b) represents the Met-SA-PASP polymer; and (c) represents the Met-MPEA-PASP polymer)


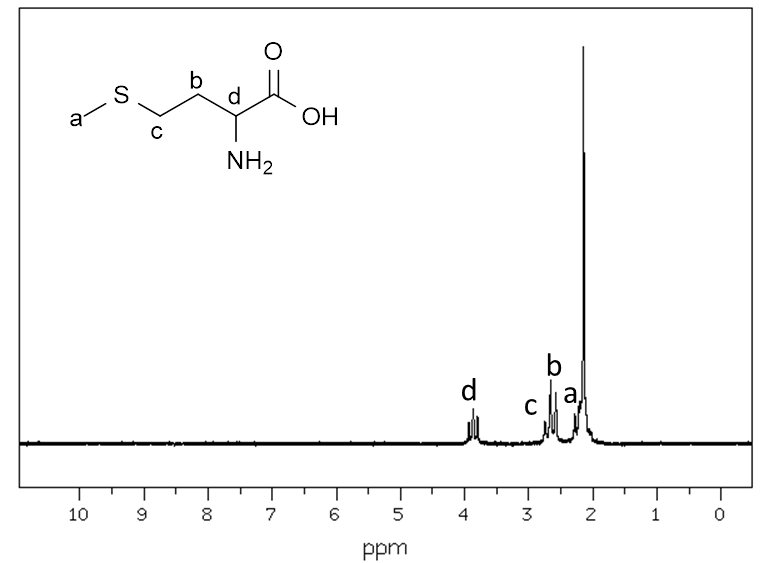


**Fig. S2** 1H NMR spectra of Met


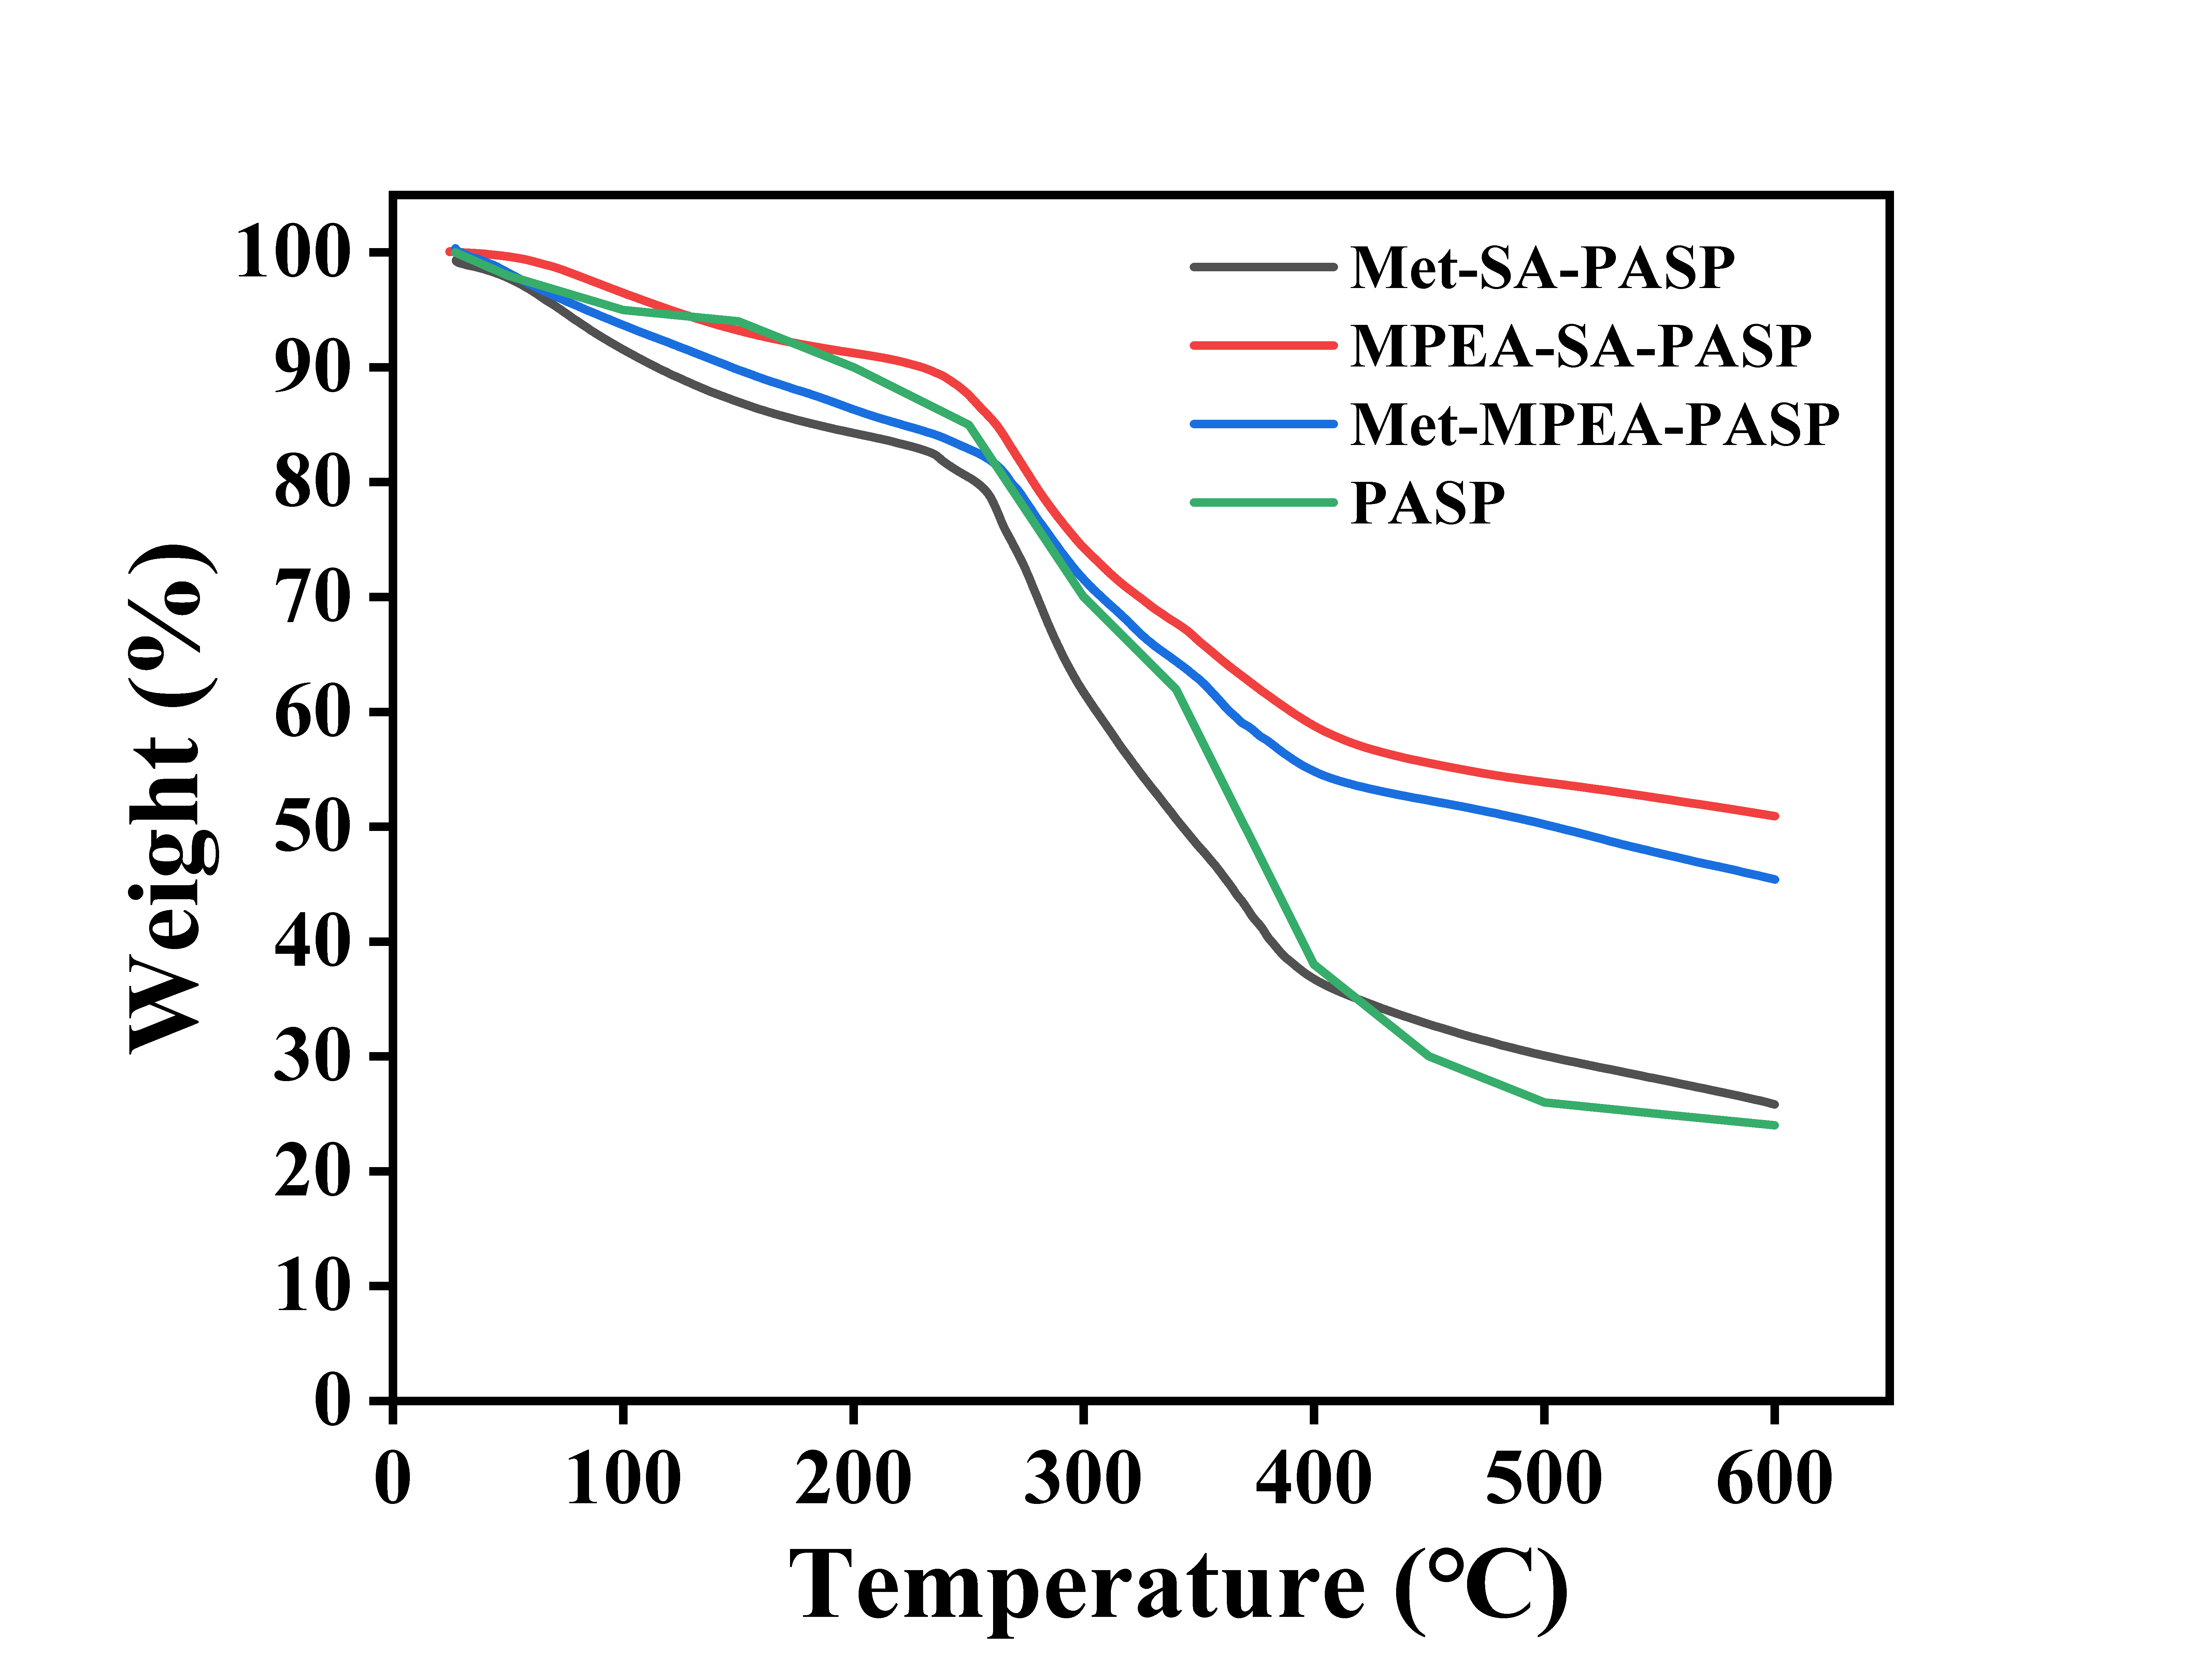


**Fig. S3** TGA curve of Met-SA-PASP, MPEA-SA-PASP, Met-MPEA-PASP and PASP
